# Supplementary material for: Coordinative Management of Soil Resources and Agricultural Farmland Environment for Food Security and Sustainable Development in China
Source: MDPI journal article supplement (doi:10.3390/ijerph20043233), 2023-02-12
Supplement: s1 [file s1]

## Supplementary Table S1

**Table S1.** Changes in soil organic carbon stocks (SOCS) from 1980 to 2011 for the 58 investigated counties across China\* The table is cited from Zhao, Y.; Wang, M.; Hu, S.; Zhang, X.; Ouyang, Z.; Zhang, G.; Huang, B.; Zhao, S.; Wu, J.; Xie, D.; et al. Economics- and policy-driven organic carbon input enhancement dominates soil organic carbon accumulation in Chinese croplands. Proc. Nat. Acad. Sci. USA 2018, 115, 4045–4050.

| County                                                                                        | SOCS in 1980<br>(Tonnes ha <sup>-1</sup> ) |        |       | SOCS in 2011<br>(Tonnes ha <sup>-1</sup> ) |        |       | Changes in SOCS<br>(Tonnes ha <sup>-1</sup> ) |        |       |
|-----------------------------------------------------------------------------------------------|--------------------------------------------|--------|-------|--------------------------------------------|--------|-------|-----------------------------------------------|--------|-------|
|                                                                                               | Lower                                      | Median | Upper | Lower                                      | Median | Upper | Lower                                         | Median | Upper |
| One crop annually in cold temperate zone                                                      |                                            |        |       |                                            |        |       |                                               |        |       |
| Naiman                                                                                        | 7.16                                       | 8.81   | 10.47 | 11.35                                      | 13.22  | 15.12 | 1.89                                          | 4.42   | 6.92  |
| Wuchuan                                                                                       | 22.38                                      | 28.13  | 34.28 | 24.15                                      | 25.93  | 27.68 | -8.47                                         | -2.25  | 3.82  |
| Baoqing                                                                                       | 47.66                                      | 54.97  | 63.70 | 58.93                                      | 66.88  | 75.00 | 0.12                                          | 11.76  | 23.07 |
| Hailun                                                                                        | 69.46                                      | 75.90  | 82.55 | 59.74                                      | 62.52  | 65.26 | -20.58                                        | -13.40 | -6.52 |
| Lindian                                                                                       | 39.38                                      | 42.80  | 46.62 | 37.52                                      | 39.00  | 40.58 | -7.91                                         | -3.81  | -0.06 |
| Dunhua                                                                                        | 67.57                                      | 76.94  | 86.12 | 65.35                                      | 69.60  | 73.96 | -17.37                                        | -7.26  | 2.93  |
| Gongzhuling                                                                                   | 27.46                                      | 30.26  | 32.91 | 28.51                                      | 30.82  | 33.36 | -2.92                                         | 0.58   | 4.26  |
| Yushu                                                                                         | 39.48                                      | 42.35  | 45.26 | 37.88                                      | 40.52  | 43.51 | -5.63                                         | -1.79  | 2.23  |
| Changtu                                                                                       | 19.09                                      | 20.93  | 23.02 | 20.51                                      | 21.83  | 23.20 | -1.54                                         | 0.90   | 3.25  |
| Fuxin                                                                                         | 16.41                                      | 18.18  | 19.95 | 18.11                                      | 19.40  | 20.72 | -0.95                                         | 1.23   | 3.43  |
| Manasi                                                                                        | 18.25                                      | 21.52  | 24.62 | 19.17                                      | 21.52  | 24.22 | -3.95                                         | 0.04   | 4.21  |
| Tabei                                                                                         | 16.76                                      | 19.42  | 21.71 | 14.83                                      | 16.56  | 18.23 | -5.75                                         | -2.83  | 0.27  |
| Ledu                                                                                          | 23.21                                      | 30.54  | 39.16 | 24.04                                      | 26.28  | 28.75 | -13.00                                        | -4.27  | 3.50  |
| Dazi                                                                                          | 32.21                                      | 36.21  | 40.22 | 36.04                                      | 38.17  | 40.47 | -2.64                                         | 2.01   | 6.55  |
| Two crops annually or three crops for two years and deciduous orchards in warm temperate zone |                                            |        |       |                                            |        |       |                                               |        |       |
| Kenli                                                                                         | 8.73                                       | 11.31  | 13.50 | 14.95                                      | 16.93  | 19.04 | 2.60                                          | 5.66   | 8.88  |
| Laiyang                                                                                       | 11.75                                      | 12.89  | 13.80 | 19.29                                      | 20.58  | 21.88 | 6.11                                          | 7.72   | 9.44  |
| Pingyi                                                                                        | 11.42                                      | 12.28  | 13.10 | 20.30                                      | 21.97  | 23.67 | 7.83                                          | 9.70   | 11.59 |
| Yucheng                                                                                       | 9.80                                       | 12.58  | 15.37 | 25.37                                      | 26.89  | 28.40 | 11.12                                         | 14.30  | 17.48 |
| Mengcheng                                                                                     | 16.60                                      | 18.44  | 20.14 | 27.10                                      | 29.12  | 31.11 | 8.03                                          | 10.69  | 13.40 |
| Shuyang                                                                                       | 12.91                                      | 14.70  | 16.54 | 29.58                                      | 31.91  | 34.18 | 14.25                                         | 17.20  | 20.08 |
| Luancheng                                                                                     | 16.19                                      | 17.39  | 18.43 | 31.62                                      | 33.43  | 35.20 | 13.96                                         | 16.04  | 18.16 |
| Nanpi                                                                                         | 15.33                                      | 17.27  | 19.47 | 20.86                                      | 22.35  | 23.92 | 2.43                                          | 5.09   | 7.57  |
| Xiangfen                                                                                      | 13.55                                      | 18.16  | 23.50 | 23.45                                      | 26.23  | 29.05 | 2.09                                          | 8.06   | 13.51 |
| Yuanping                                                                                      | 14.89                                      | 18.69  | 22.99 | 23.82                                      | 28.33  | 33.42 | 3.40                                          | 9.65   | 15.93 |
| Ningxian                                                                                      | 12.76                                      | 13.75  | 14.79 | 17.61                                      | 18.36  | 19.07 | 3.35                                          | 4.60   | 5.84  |
| Zhuanglang                                                                                    | 13.80                                      | 14.64  | 15.51 | 18.79                                      | 19.73  | 20.67 | 3.81                                          | 5.10   | 6.36  |
| Pingluo                                                                                       | 16.12                                      | 16.82  | 17.50 | 21.69                                      | 23.06  | 24.41 | 4.69                                          | 6.25   | 7.79  |
| Wugong                                                                                        | 16.58                                      | 17.47  | 18.34 | 27.49                                      | 28.38  | 29.29 | 9.66                                          | 10.92  | 12.18 |
| Fengqiu                                                                                       | 14.98                                      | 15.98  | 17.04 | 24.57                                      | 26.73  | 29.07 | 8.32                                          | 10.75  | 13.30 |
| Yuzhou                                                                                        | 12.16                                      | 15.11  | 18.62 | 27.43                                      | 29.39  | 31.36 | 10.25                                         | 14.27  | 17.82 |

|                                                                                                                                                   |       |       |       |       |       |       |        |        |       |
|---------------------------------------------------------------------------------------------------------------------------------------------------|-------|-------|-------|-------|-------|-------|--------|--------|-------|
| Two crops containing upland and rice annually and deciduous and evergreen orchards in transitional subtropics                                     |       |       |       |       |       |       |        |        |       |
| Dingyuan                                                                                                                                          | 11.10 | 13.26 | 15.64 | 25.39 | 27.57 | 29.70 | 11.07  | 14.29  | 17.37 |
| Xuancheng                                                                                                                                         | 23.31 | 25.67 | 28.46 | 32.60 | 35.06 | 37.59 | 5.61   | 9.35   | 12.88 |
| Rugao                                                                                                                                             | 14.37 | 15.98 | 17.56 | 21.85 | 23.10 | 24.42 | 5.07   | 7.13   | 9.19  |
| Qingpu                                                                                                                                            | 37.98 | 43.02 | 48.24 | 37.12 | 40.07 | 43.03 | -9.10  | -2.98  | 2.86  |
| Tongxiang                                                                                                                                         | 32.83 | 38.26 | 43.97 | 25.17 | 27.32 | 29.58 | -17.10 | -10.92 | -5.04 |
| Fangcheng                                                                                                                                         | 13.91 | 15.32 | 16.64 | 19.64 | 20.92 | 22.24 | 3.77   | 5.61   | 7.53  |
| Huangchuan                                                                                                                                        | 18.41 | 19.96 | 21.51 | 22.59 | 24.99 | 27.55 | 2.17   | 5.06   | 7.98  |
| Xishui                                                                                                                                            | 18.80 | 20.57 | 22.35 | 27.71 | 30.18 | 32.78 | 6.51   | 9.59   | 12.81 |
| One or double-cropping rice followed by a cool-loving crop or three upland crops annually and evergreen economic crops and orchards in subtropics |       |       |       |       |       |       |        |        |       |
| Jinhua                                                                                                                                            | 26.41 | 28.67 | 31.15 | 30.47 | 32.85 | 35.00 | 0.73   | 4.15   | 7.27  |
| JinXian                                                                                                                                           | 26.17 | 28.94 | 32.18 | 38.95 | 42.29 | 44.93 | 8.86   | 13.26  | 17.24 |
| Taihe                                                                                                                                             | 25.28 | 30.47 | 35.75 | 37.20 | 39.95 | 42.80 | 3.58   | 9.49   | 15.34 |
| Jianou                                                                                                                                            | 30.91 | 38.78 | 46.52 | 42.10 | 44.65 | 47.18 | -2.71  | 5.93   | 14.58 |
| Guiyang                                                                                                                                           | 33.29 | 36.43 | 39.76 | 38.14 | 42.13 | 46.20 | 0.49   | 5.68   | 10.75 |
| Wugang                                                                                                                                            | 26.50 | 29.99 | 33.77 | 38.93 | 41.72 | 44.50 | 7.11   | 11.73  | 16.14 |
| Xingan                                                                                                                                            | 30.65 | 34.70 | 38.46 | 34.01 | 38.26 | 45.12 | -2.43  | 3.62   | 11.42 |
| Guanghan                                                                                                                                          | 39.12 | 40.12 | 41.15 | 41.07 | 43.42 | 45.82 | 0.72   | 3.30   | 5.84  |
| Yanting                                                                                                                                           | 13.80 | 15.48 | 17.18 | 26.24 | 28.05 | 29.89 | 10.09  | 12.59  | 15.13 |
| Dianjiang                                                                                                                                         | 18.35 | 19.94 | 21.62 | 20.75 | 22.55 | 24.52 | 0.11   | 2.62   | 5.12  |
| Puding                                                                                                                                            | 38.28 | 41.80 | 45.37 | 40.63 | 44.31 | 48.25 | -2.59  | 2.53   | 7.76  |
| Zunyi                                                                                                                                             | 28.61 | 33.24 | 37.40 | 32.75 | 36.23 | 40.02 | -2.49  | 3.06   | 8.93  |
| Luliang                                                                                                                                           | 29.32 | 30.39 | 31.47 | 40.26 | 43.80 | 47.58 | 9.64   | 13.41  | 17.24 |
| Luxi                                                                                                                                              | 37.54 | 41.65 | 45.57 | 37.99 | 41.29 | 44.83 | -5.59  | -0.35  | 5.19  |
| Double-cropping rice annually followed by warm-loving crops and evergreen economic crops and orchards in tropics                                  |       |       |       |       |       |       |        |        |       |
| Zhangpu                                                                                                                                           | 30.85 | 36.41 | 43.29 | 35.83 | 38.82 | 41.62 | -5.06  | 2.32   | 8.64  |
| Wuming                                                                                                                                            | 20.52 | 22.75 | 25.00 | 31.13 | 35.17 | 38.70 | 7.81   | 12.41  | 16.71 |
| Gaozhou                                                                                                                                           | 19.83 | 22.43 | 24.80 | 29.85 | 31.83 | 34.13 | 6.31   | 9.42   | 12.82 |
| Taishan                                                                                                                                           | 24.97 | 29.93 | 34.45 | 30.70 | 33.03 | 35.37 | -2.00  | 3.17   | 8.47  |
| Yingde                                                                                                                                            | 26.06 | 29.30 | 32.43 | 25.95 | 28.40 | 31.01 | -4.98  | -0.87  | 3.16  |
| Danzhou                                                                                                                                           | 22.35 | 27.35 | 32.58 | 19.17 | 22.40 | 25.37 | -11.13 | -5.01  | 0.85  |

\*The 58 counties are divided into 5 groups according to crop rotations and climate zones. The “Lower” and “Upper” of soil organic carbon stocks refer to the 95% confidence intervals of the bootstrap estimates.
